# Supplementary material
Source: publisher site journal article supplement (https://www.dovepress.com/article/477248)
Supplement: Supplementary file 1 [file get_supplementary_file.php]

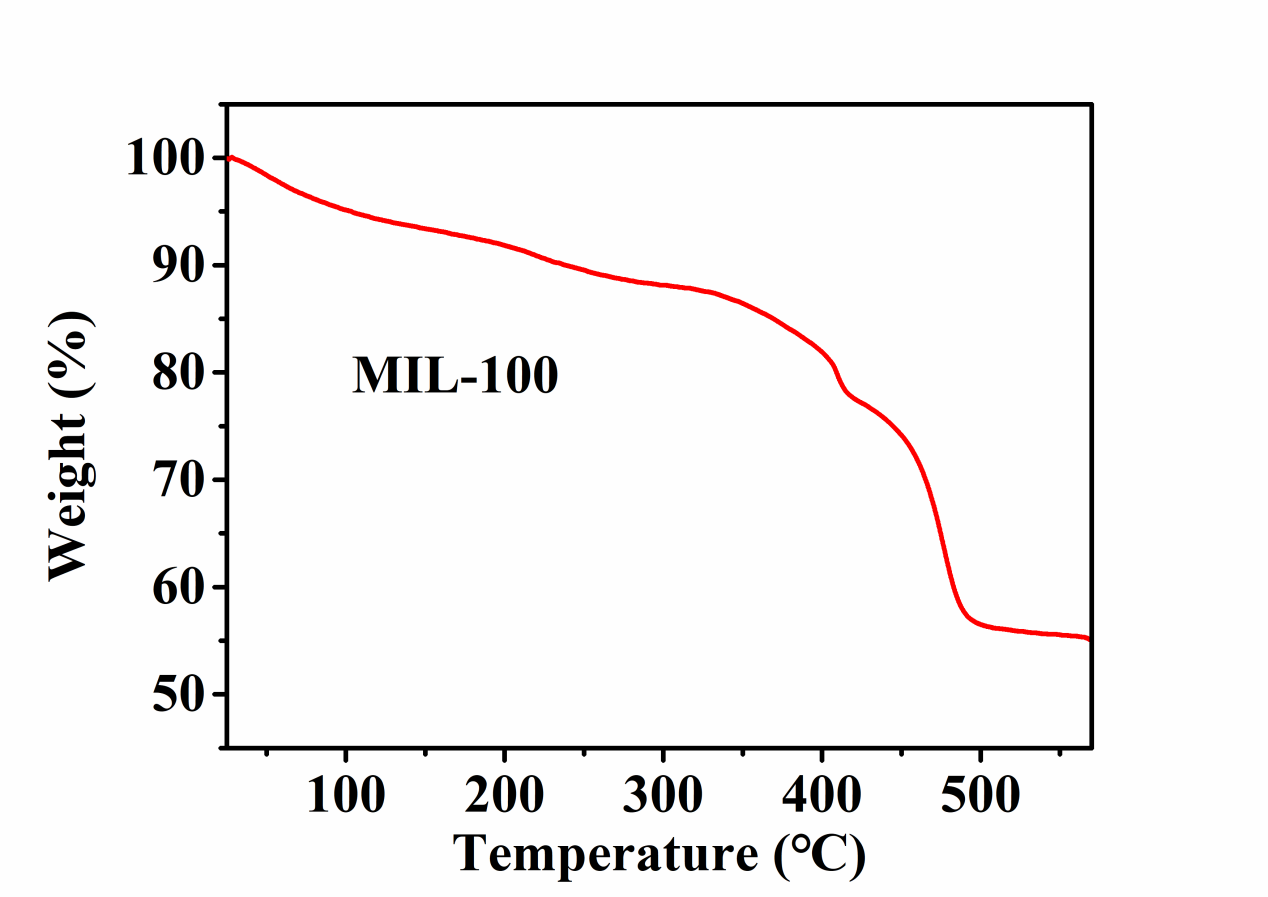


**Figure S1.** The TGA curves of MIL-100.


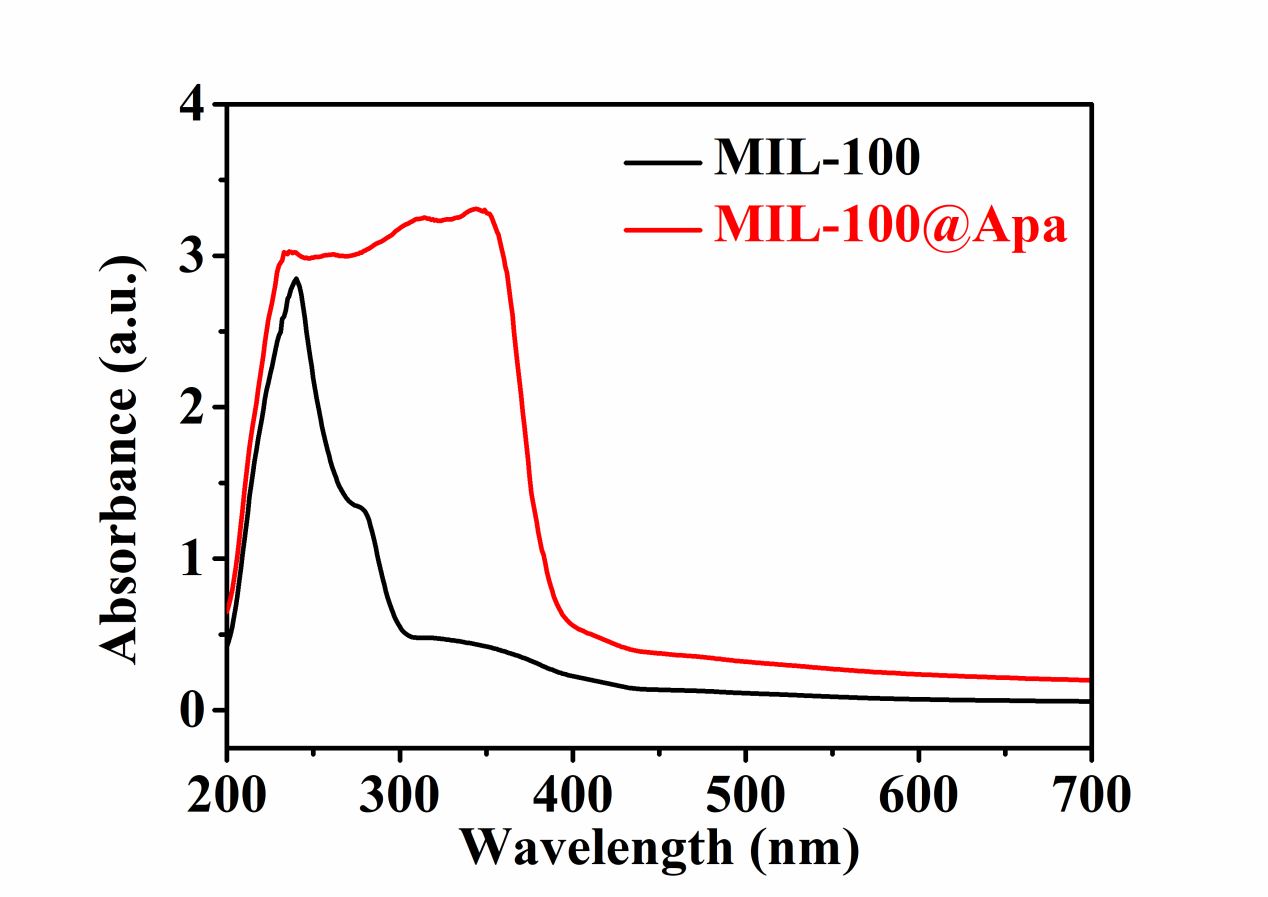


**Figure S2.** UV-vis absorption spectra of MIL-100 and MIL-100@Apa nanoparticles.


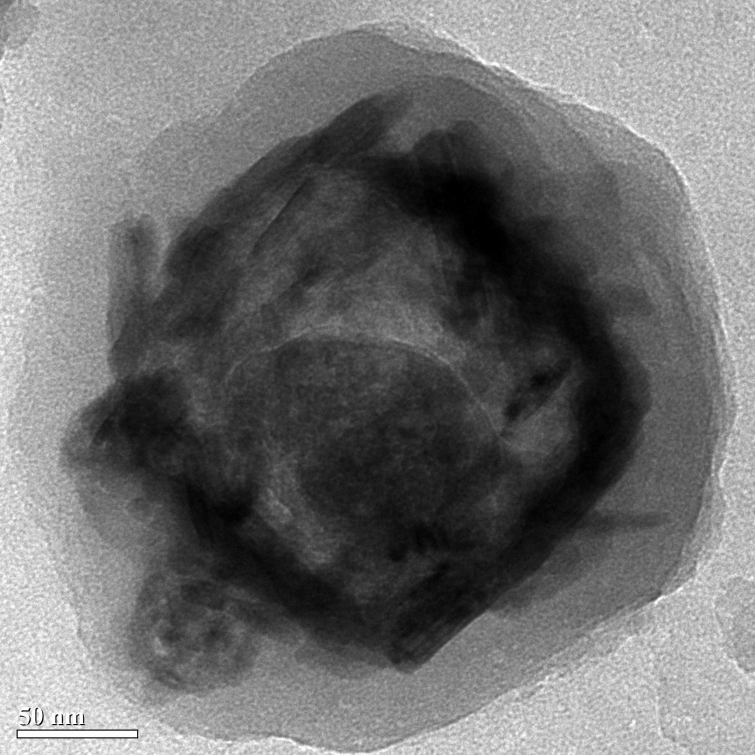


**Figure S3.** TEM images of MIL-100@Apa nanostructures.
